# Supplementary material for: Modification of Ga2O3by an Ag–Cr core–shell cocatalyst enhances photocatalytic CO evolution for the conversion of CO2by H2O
Source: Royal Society of Chemistry journal article supplement (doi:10.1039/c7cc07800e), 2017-12-04
Supplement: c7cc07800e1.pdf [file c7cc07800e1.pdf]

Supplementary Material (ESI) for Chemical Communications  
This journal is (c) The Royal Society of Chemistry 2017

## Modification of Ga<sub>2</sub>O<sub>3</sub> by Ag–Cr Core–shell Cocatalyst Enhances Photocatalytic CO Evolution for the Conversion of CO<sub>2</sub> by H<sub>2</sub>O

Rui Pang,<sup>a</sup> Kentaro Teramura,<sup>\*a, b</sup> Hiroyuki Tatsumi,<sup>a</sup> Hiroyuki Asakura,<sup>a, b</sup> Saburo Hosokawa,<sup>a, b</sup> and Tsunehiro Tanaka<sup>\*a, b</sup>

<sup>a</sup> Department of Molecular Engineering, Graduate School of Engineering, Kyoto University, Kyoto 615–8510, Japan

<sup>b</sup> Elements Strategy Initiative for Catalysts & Batteries (ESICB), Kyoto University, 1–30 Goryo–Ohara, Nishikyo–ku, Kyoto 615–8245, Japan

### Experimental Section

#### Preparation of Ag–Cr/Ga<sub>2</sub>O<sub>3</sub>

Ag–Cr/Ga<sub>2</sub>O<sub>3</sub> was prepared by a facile simultaneously photodeposition method.<sup>1, 2</sup> Generally, 1.0 g of Ga<sub>2</sub>O<sub>3</sub> (Kojundo, 99.99%) powder was dispersed in 1.0 L of ultra–pure water containing a required amount of AgNO<sub>3</sub> and Cr(NO<sub>3</sub>)<sub>3</sub>, and the dissolved air in the solution was completely degassed by a flow of Ar gas. The suspension was irradiated under a 400 W high–pressure Hg lamp with Ar gas flowing for 1.0 h, followed by filtration and drying at room temperature. The amount of Ag and Cr was the molar ratio of Ag/Ga and Cr/Ga.

1. K. Maeda, D. Lu, K. Teramura and K. Domen, *J. Mater. Chem.*, 2008, **18**, 3539–3542.
2. K. Maeda, D. Lu, K. Teramura and K. Domen, *Energ. Environ. Sci.*, 2010, **3**, 470–477.

#### Characterization

The as–prepared Ag–Cr/Ga<sub>2</sub>O<sub>3</sub> was studied by X–ray diffractometry (XRD, Rigaku Multiflex) with Cu K $\alpha$  radiation ( $\lambda$  = 0.154 nm), field–emission scanning electron microscopy (FE–SEM, SU–8220, Hitachi High Technologies), transmission electron microscopy (TEM, JEM–2100F), X–ray photoelectron spectroscopy (XPS, Shimadzu, ESCA 3400, Mg K $\alpha$ ), and X–ray absorption fine structure (XAFS) at the Ag K–edge and Cr K–edge (beam line BL01B1 of SPring–8).

### Photocatalytic reaction

The photocatalytic reduction of  $\text{CO}_2$  was carried out using a flow system with an inner-irradiation-type reaction vessel at ambient pressure. First, the synthesized photocatalyst (0.5 g) was dispersed in ultrapure water (1.0 L) containing 0.1 M  $\text{NaHCO}_3$ . Second,  $\text{CO}_2$  was bubbled into the solution at a flow rate of  $30 \text{ mL min}^{-1}$ . Third, the suspension was illuminated using a 400 W high-pressure mercury lamp with a quartz filter connected to a water cooling system. The amounts of evolved  $\text{H}_2$  and  $\text{O}_2$  were detected using a thermal conductivity detector–gas chromatography system (TCD–GC, Shimadzu Corp; MS–5A column, Ar carrier). The amount of evolved CO was analyzed by a flame ionization detector–GC with a methanizer (FID–GC, ShinCarbon ST column,  $\text{N}_2$  carrier), the reactor set-up is shown in Figure S1.

In the backward reaction, the processes were almost the same as those of the photocatalytic reduction of  $\text{CO}_2$ , except that the CO,  $\text{O}_2$  and diluent gas Ar were bubbled into the ultrapure water solution with a total flow rate of  $30 \text{ mL min}^{-1}$ , and the amount of evolved  $\text{CO}_2$  was analyzed by a FID–GC.

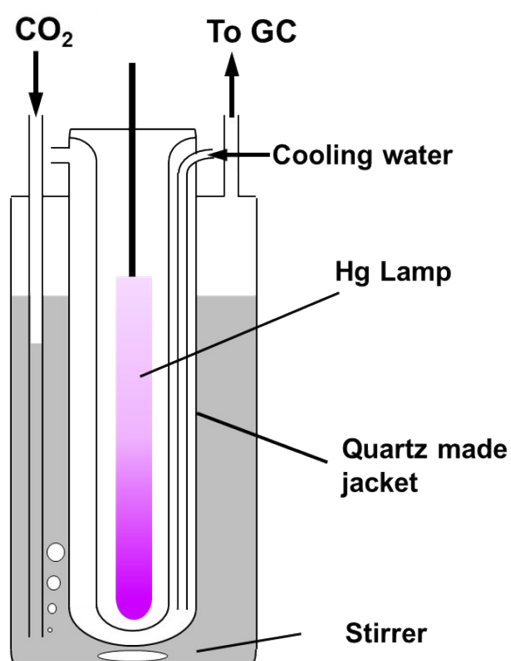

**Fig. S1** Reactor set-up for the photocatalytic reduction of  $\text{CO}_2$  under UV light irradiation

## Supplementary Figures and Table

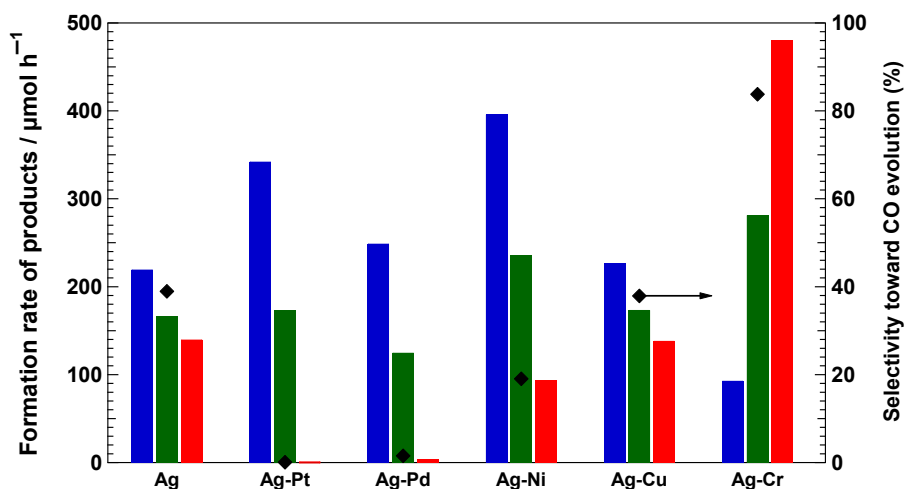

**Fig. S2** Formation rate of H<sub>2</sub> (blue), O<sub>2</sub> (green), CO (red), and selectivity toward CO (black diamond) evolution for the photocatalytic conversion of CO<sub>2</sub> in water over Ag/Ga<sub>2</sub>O<sub>3</sub> and Ag–metals/Ga<sub>2</sub>O<sub>3</sub> photocatalysts. Photocatalyst powder: 0.5 g, reaction solution volume: 1.0 L, additive: 0.1 M NaHCO<sub>3</sub>, Ag loading amount: 1.0 mol% (Ag/Ga), metals loading amount: 1.0 mol% (metals/Ga), modification method: simultaneously photodeposition (SPD) method, CO<sub>2</sub> flow rate: 30 mL min<sup>-1</sup>, light source: 400 W high–pressure Hg lamp.

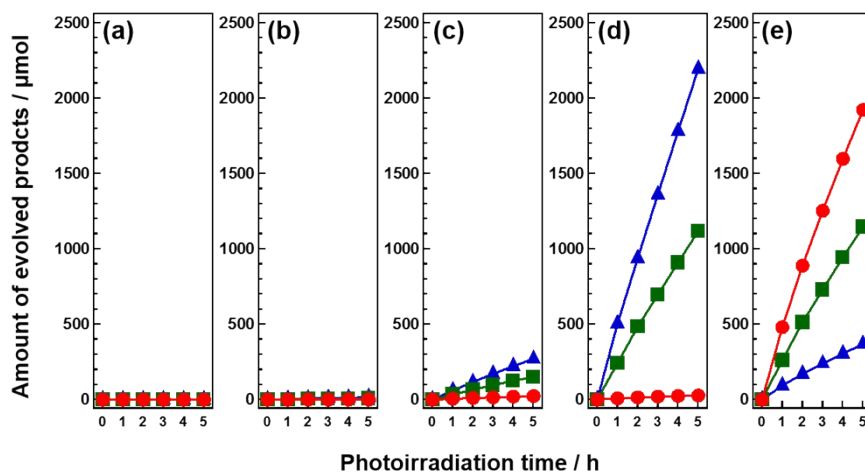

**Fig. S3** Amounts of H<sub>2</sub> (blue triangle), O<sub>2</sub> (green square), and CO (red circle) from controlled experiments for the photocatalytic conversion of CO<sub>2</sub> in water using the Ag–Cr/Ga<sub>2</sub>O<sub>3</sub> photocatalyst. (a) dark condition; (b) no photocatalyst; (c) no additive; (d) with Ar gas flow; (e) typical condition. Photocatalyst powder: 0.5 g, reaction solution volume: 1.0 L, additive: 0.1 M NaHCO<sub>3</sub>, Ag loading amount: 1.0 mol%, Cr loading amount: 1.0 mol%, CO<sub>2</sub> flow rate: 30 mL min<sup>−1</sup>, light source: 400 W high–pressure Hg lamp.

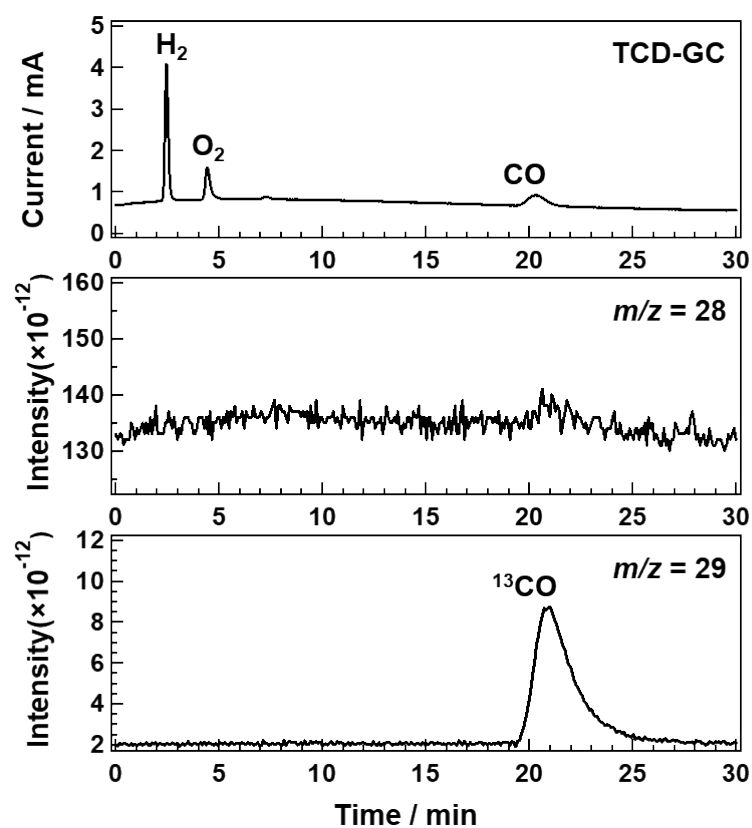

**Fig S4.** Gas chromatograms and mass spectra ( $m/z$  28, 29) for the photocatalytic conversion of  $^{13}\text{CO}_2$  by  $\text{H}_2\text{O}$  over Ag–Cr/ $\text{Ga}_2\text{O}_3$ . Photocatalyst powder: 0.5 g, reaction solution volume: 1.0 L, additive: 0.1 M  $\text{NaHCO}_3$ , Ag loading amount: 1.0 mol%, Cr loading amount: 1.0 mol%,  $\text{CO}_2$  flow rate:  $30 \text{ mL min}^{-1}$ , light source: 400 W high-pressure Hg lamp.

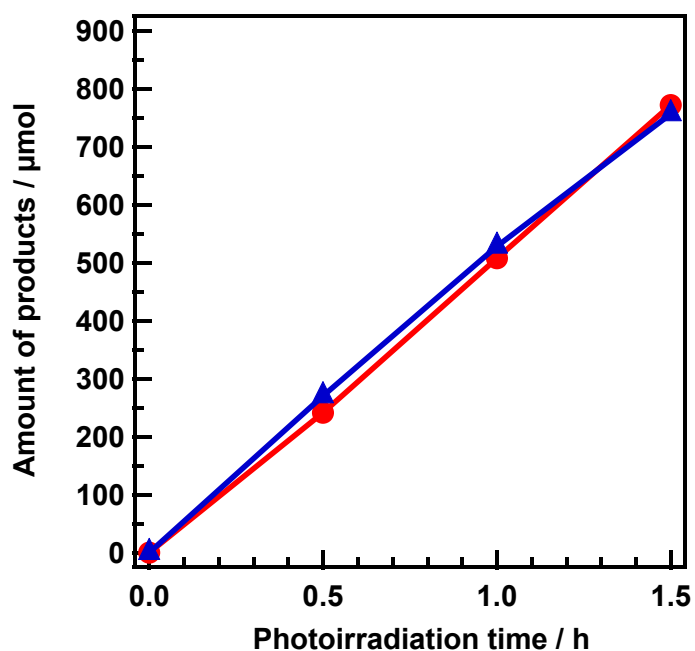

**Fig S5.** Time course of CO (triangle) and  $^{13}\text{CO}$  (circle) determined by FID–GC and mass, respectively, for the photocatalytic conversion of  $\text{CO}_2$  over Ag–Cr/ $\text{Ga}_2\text{O}_3$ . Photocatalyst powder: 0.5 g, reaction solution volume: 1.0 L, additive: 0.1 M  $\text{NaHCO}_3$ , Ag loading amount: 1.0 mol%, Cr loading amount: 1.0 mol%,  $\text{CO}_2$  flow rate:  $30 \text{ mL min}^{-1}$ , light source: 400 W high–pressure Hg lamp.

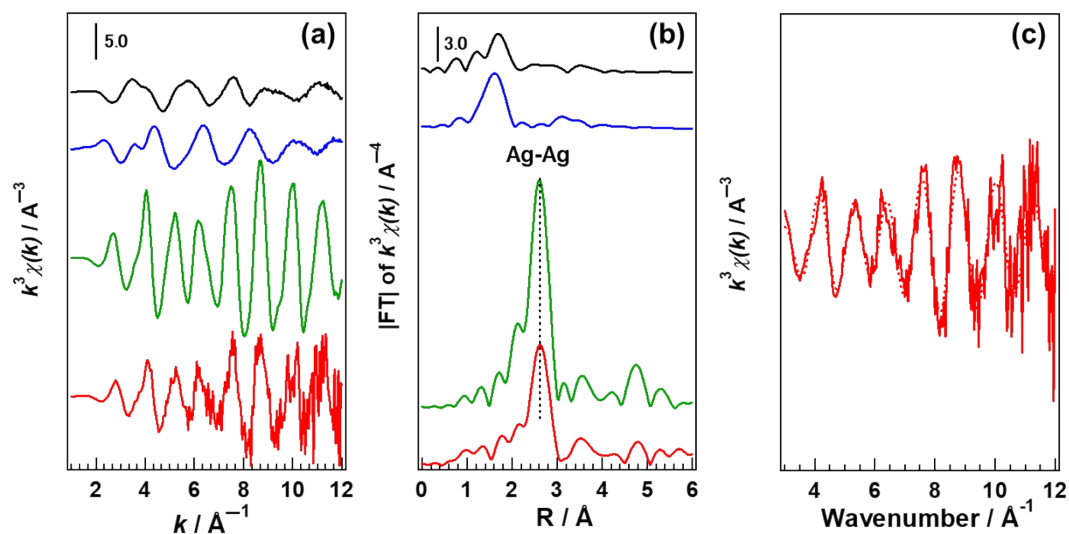

**Fig. S6** Ag K-edge (a) EXAFS and (b) Fourier transforms (FT) of the EXAFS spectra of  $\text{Ag}_2\text{CO}_3$  (black),  $\text{Ag}_2\text{O}$  (blue), Ag foil (green), and Ag–Cr/ $\text{Ga}_2\text{O}_3$  (red), (c) Fourier-filtered EXAFS function (solid line) and resulting curve fit (dotted line) for the main peak appearing at 2.0–3.0 Å in FT of  $k^3$ -weighted EXAFS (Ag–Cr/ $\text{Ga}_2\text{O}_3$  spectrum in Fig. S6b).

**Table S1** Curve-fitting analysis of Fourier-transformed EXAFS of Ag–Cr/ $\text{Ga}_2\text{O}_3$ .

| Samples                        | Scatter atom | N <sup>a</sup> | R <sup>b</sup> (Å) | $\Delta(\sigma^2)^c$ (Å <sup>2</sup> ) | R <sub>f</sub> <sup>d</sup> |
|--------------------------------|--------------|----------------|--------------------|----------------------------------------|-----------------------------|
| Ag–Cr/ $\text{Ga}_2\text{O}_3$ | Ag           | 4.80           | 2.87               | $1.08 \times 10^{-2}$                  | $5.77 \times 10^{-3}$       |
| Ag foil <sup>e</sup>           | Ag           | (12)           | 2.89               |                                        |                             |

<sup>a</sup> Coordination number, <sup>b</sup> Bond distance, <sup>c</sup> Debye–Waller factor, <sup>d</sup> Residual factor, <sup>e</sup> Data from X-ray crystallography

As shown in Fig. S6b, the peak at 2.6 Å is assigned to the Ag–Ag shell. Inverse Fourier transform of the Ag–Cr/ $\text{Ga}_2\text{O}_3$  (red) spectrum at 2.6 Å ( $R = 2.0\text{--}3.0$  Å) in Fig. S6b gives the EXAFS oscillation of Ag–Ag shell, as shown in Fig. S6c. The dotted line in Fig. S6c shows the result of a curve-fitting analysis using Ag–Ag shell parameters in the  $k$  region of  $3.0\text{--}14.0$  Å<sup>−1</sup>. A simulated spectrum fitted well with the experimental one. As shown in Table 1, the curve-fitting analysis of the peak at 2.6 Å showed that this peak can be assigned to Ag–Ag shell with a coordination number of 4.8 and bond distance 2.87 Å, which is smaller with Ag foil.<sup>3</sup> The height of Ag–Ag shell peak of Ag–Cr/ $\text{Ga}_2\text{O}_3$  was lower than that of Ag foil, which indicates that the particle size of Ag in Ag–Cr/ $\text{Ga}_2\text{O}_3$  is smaller than Ag foil.

3. H. A. Gasteiger, S. S. Kocha, B. Sompalli and F. T. Wagner, *Appl. Catal. B: Environ.*, 2005, **56**, 9–35.

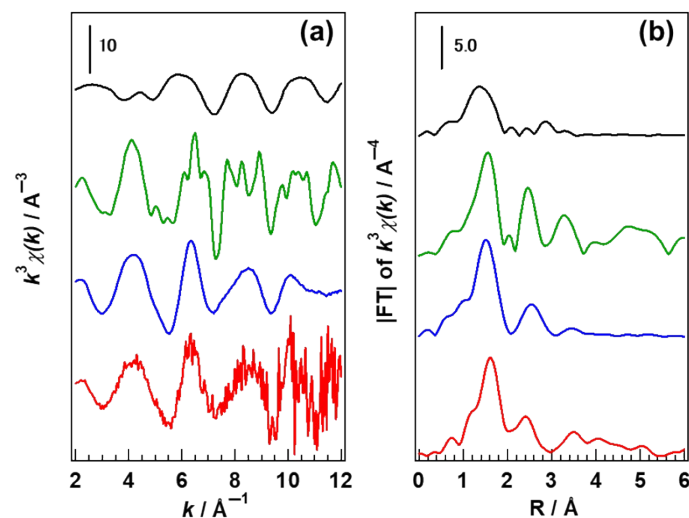

**Fig. S7** Cr K-edge (a) EXAFS and (b) Fourier transforms (FT) EXAFS spectra of  $\text{CrO}_3$  (black),  $\text{Cr}_2\text{O}_3$  (blue),  $\text{Cr}(\text{OH})_3 \cdot x\text{H}_2\text{O}$  (green), and  $\text{Ag-Cr/Ga}_2\text{O}_3$  (red).

As shown in Fig. S7b, the peak with the largest FT moduli at 1.7  $\text{\AA}$  is assigned to oxygen atoms in the first coordination sphere of Cr (Cr–O). At further radial distance of about 2.6  $\text{\AA}$  and 3.2  $\text{\AA}$  with smaller FT moduli are assigned as contributions from distal Cr atoms (Cr–Cr).<sup>4</sup>

4. D. Rai, D. A. Moore, N. J. Hess, K. M. Rosso, L. Rao and S. M. Heald, *J. Solution Chem.*, 2007, **36**, 1261–1285.



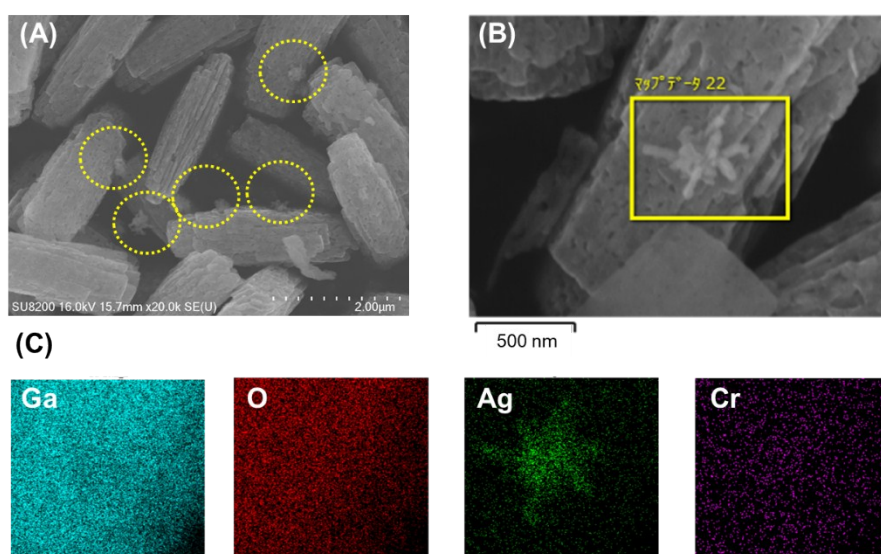

**Fig. S8** (A) SEM image of Ag–Cr(OH)<sub>3</sub>·xH<sub>2</sub>O/Ga<sub>2</sub>O<sub>3</sub>; EDS analysis of Ag–Cr(OH)<sub>3</sub>·xH<sub>2</sub>O/Ga<sub>2</sub>O<sub>3</sub>; (B) selected SEM images, (C) Ga, O, Ag, and Cr mapping images. Ag loading amount: 1.0 mol%, Cr loading amount: 1.0 mol%.

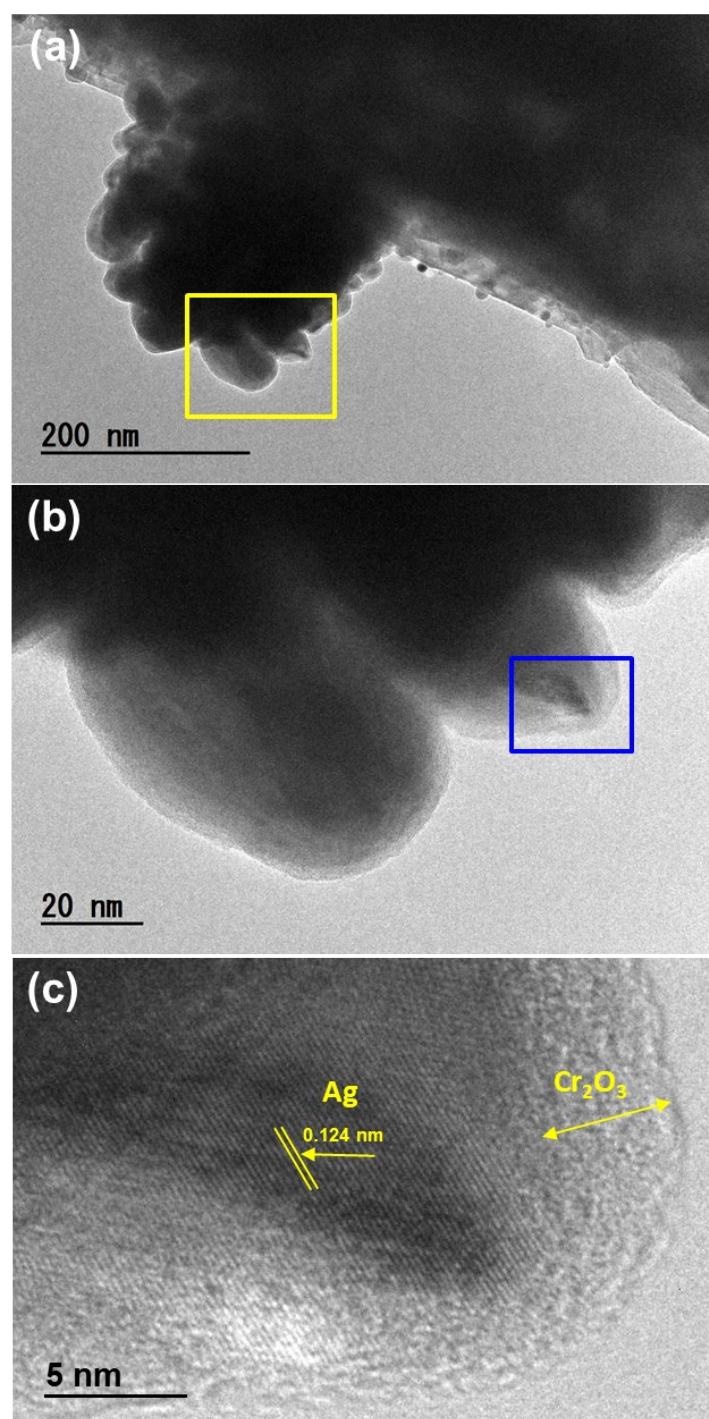

**Fig. S9** (a), (b) TEM images, and (c) high-resolution TEM (HRTEM) image of Ag-Cr(OH)<sub>3</sub>·xH<sub>2</sub>O cocatalyst ((b) and (c) are the enlarged TEM images of the yellow rectangular in Figure (a) and blue rectangular in Figure (b), respectively).

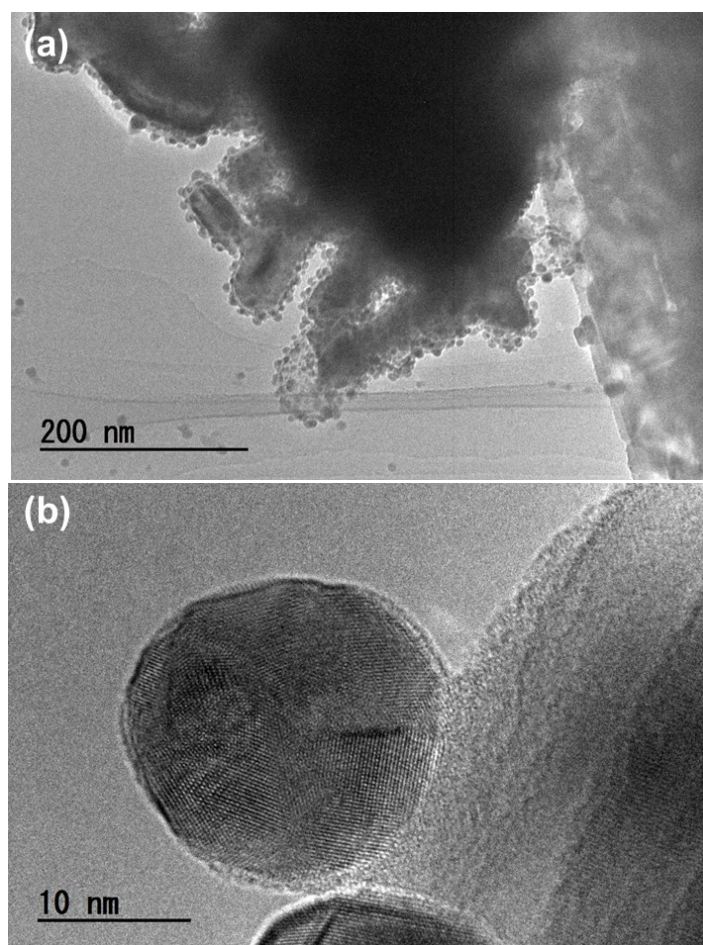

**Fig. S10** (a) TEM image and (b) HRTEM image of the as prepared  $\text{Ag-Cr(OH)}_3 \cdot x\text{H}_2\text{O/Ga}_2\text{O}_3$ .

**Table S2** Backward reactions for the photocatalytic reduction of CO<sub>2</sub> in H<sub>2</sub>O over Ag/Ga<sub>2</sub>O<sub>3</sub> and Ag–Cr(OH)<sub>3</sub>·xH<sub>2</sub>O/Ga<sub>2</sub>O<sub>3</sub>.<sup>[b]</sup>

| Catalyst                             | Flow rates of gases<br>/ μmol h <sup>-1</sup> |                | Rates of detected gases<br>/ μmol h <sup>-1</sup> |                |      |                 | Balance 1<br>$R_{\text{CO}_2} / R_{\text{CO}}$ | Balance 2<br>$R_{\text{CO}_2} / 2R_{\text{O}_2}$ |
|--------------------------------------|-----------------------------------------------|----------------|---------------------------------------------------|----------------|------|-----------------|------------------------------------------------|--------------------------------------------------|
|                                      | CO                                            | O <sub>2</sub> | H <sub>2</sub>                                    | O <sub>2</sub> | CO   | CO <sub>2</sub> |                                                |                                                  |
| Ag/Ga <sub>2</sub> O <sub>3</sub>    | 487                                           | 301            | 20.8                                              | 260            | 382  | 103             | 0.98                                           | 1.01                                             |
|                                      | 982                                           | 538            | 56.8                                              | 420            | 670  | 320             | 1.03                                           | 1.03                                             |
|                                      | 2500                                          | 1590           | 7.45                                              | 1200           | 1750 | 820             | 1.09                                           | 1.02                                             |
| Ag–Cr/Ga <sub>2</sub> O <sub>3</sub> | 487                                           | 301            | 226                                               | 383            | 402  | 84.5            | 0.99                                           | 1.03                                             |
|                                      | 982                                           | 538            | 282                                               | 590            | 782  | 202             | 1.01                                           | 1.02                                             |
|                                      | 2500                                          | 1590           | 300                                               | 1560           | 2170 | 320             | 0.97                                           | 0.99                                             |

<sup>[b]</sup> Photocatalyst powder: 0.5 g, reaction solution: 1.0 L H<sub>2</sub>O, Ag loading amount: 1.0 mol%, Cr loading amount: 1.0 mol%, light source: 400 W high-pressure Hg lamp.

Backward reaction:  $2\text{CO} + \text{O}_2 \rightarrow 2\text{CO}_2$

Balance 1: Produced CO<sub>2</sub> / Consumed CO =  $R_{\text{CO}_2} / R_{\text{CO}}$

Balance 2:  $0.5 \times$  Produced CO<sub>2</sub> / Consumed O<sub>2</sub> =  $R_{\text{CO}_2} / 2R_{\text{O}_2}$

where  $R_x$  is the formation rate of species x

**Calculation of the consumed amount of CO and O<sub>2</sub> for the backward reaction.**

Consumed amount of CO = Flowing amount of CO – Detected amount of CO

Because the water splitting and backward reaction for CO<sub>2</sub> reduction happen simultaneously in the reactor under photoirradiation, as a result, the detected O<sub>2</sub> contains two parts: the residual of flowing O<sub>2</sub> after the backward reaction, and the O<sub>2</sub> produced by water splitting. The detected amount of O<sub>2</sub> can be calculated as follows:

Detected amount of O<sub>2</sub> = Flowing amount of O<sub>2</sub> – Consumed amount of O<sub>2</sub> + Produced amount of O<sub>2</sub>

Consumed amount of O<sub>2</sub> = Flowing amount of O<sub>2</sub> – Detected amount of O<sub>2</sub> + Produced amount of O<sub>2</sub> = Flowing amount of O<sub>2</sub> – Detected amount of O<sub>2</sub> + 0.5 × Produced amount of H<sub>2</sub>
